# Supplementary material for: The mitochondrial alternative oxidase Aox1 is needed to cope with respiratory stress but dispensable for pathogenic development in Ustilago maydis
Source: PubMed Central journal article supplement (PMC5342259; doi:10.1371/journal.pone.0173389), 2017-03-08
Supplement: pone.0173389.s001.pdf [file pone.0173389.s001.pdf]

## Description of *U. maydis* strains used in this study.

| Strain                                | Locus                 | Progenitor strain | Short description                                                                                                                                                                                             |
|---------------------------------------|-----------------------|-------------------|---------------------------------------------------------------------------------------------------------------------------------------------------------------------------------------------------------------|
| FB1                                   |                       |                   | <i>Wild type strain</i> [1]                                                                                                                                                                                   |
| FB2                                   |                       |                   | <i>Wild type strain</i> [1]                                                                                                                                                                                   |
| AB33                                  | <i>b</i>              | FB2               | <i>Pnar:bw2bE1</i> , expression of active b heterodimer under control of the <i>nar1</i> promoter, strain grows filamentously upon changing the nitrogen source. [2]                                          |
| FB1aox1Δ                              | <i>aox1</i>           | FB1               | Carrying a deletion of <i>aox1</i> .                                                                                                                                                                          |
| FB2aox1Δ                              | <i>aox1</i>           | FB2               | Carrying a deletion of <i>aox1</i> .                                                                                                                                                                          |
| AB33aox1Δ                             | <i>aox1</i>           | AB33              | Carrying a deletion of <i>aox1</i> .                                                                                                                                                                          |
| FB2aox1-Gfp                           | <i>aox1</i>           | FB2aox1Δ          | Expressing Aox1 C-terminally fused to eGfp.                                                                                                                                                                   |
| AB33aox1-Gfp                          | <i>aox1</i>           | AB33aox1Δ         | Expressing Aox1 C-terminally fused to eGfp.                                                                                                                                                                   |
| FB2P <sub>otef</sub> :aox1-Gfp        | <i>ip<sup>S</sup></i> | FB2               | <i>aox1-Gfp</i> is ectopically integrated in the defined <i>ip<sup>S</sup></i> locus and under control of the strong constitutive P <sub>otef</sub> promoter.                                                 |
| FB2P <sub>otef</sub> :5'UTR-aox1-Gfp  | <i>ip<sup>S</sup></i> | FB2               | <i>aox1-Gfp</i> is ectopically integrated in the defined <i>ip<sup>S</sup></i> locus and under control of the strong constitutive P <sub>otef</sub> promoter. In this construct the native 5'UTR is retained. |
| AB33P <sub>otef</sub> :aox1-Gfp       | <i>ip<sup>S</sup></i> | AB33              | <i>aox1-Gfp</i> is ectopically integrated in the defined <i>ip<sup>S</sup></i> locus and under control of the strong constitutive P <sub>otef</sub> promoter.                                                 |
| AB33P <sub>otef</sub> :5'UTR-aox1-Gfp | <i>ip<sup>S</sup></i> | AB33              | <i>aox1-Gfp</i> is ectopically integrated in the defined <i>ip<sup>S</sup></i> locus and under control of the strong constitutive P <sub>otef</sub> promoter. In this construct the native 5'UTR is retained. |

## Generation of *U. maydis* strains used in this study.

| Strains                                        | Relevant genotype                  | Uma  | Reference  | Transformed plasmid                                    | Locus                 | Progenitor         |
|------------------------------------------------|------------------------------------|------|------------|--------------------------------------------------------|-----------------------|--------------------|
| AB33                                           | <i>a2 P<sub>nar.</sub>:bW2 bE1</i> | 133  | [2]        | pAB33                                                  | <i>b</i>              | FB2                |
| FB1 <i>aox1</i> Δ                              | <i>aox1</i> Δ                      | 1328 | this study | pAox1Δ_HygR<br>(pUMa2163)                              | <i>aox1</i>           | FB1                |
| FB2 <i>aox1</i> Δ                              | <i>aox1</i> Δ                      | 1329 | this study | pAox1Δ_HygR<br>(pUMa2163)                              | <i>aox1</i>           | FB2                |
| AB33 <i>aox1</i> Δ                             | <i>aox1</i> Δ                      | 1330 | this study | pAox1Δ_HygR<br>(pUMa2169)                              | <i>aox1</i>           | AB33               |
| FB2 <i>aox1</i> -Gfp                           | <i>aox1-Gfp</i>                    | 1333 | this study | pAox1-Gfp_NatR<br>(pUMa2169)                           | <i>aox1</i>           | FB2 <i>aox1</i> Δ  |
| AB33 <i>aox1</i> -Gfp                          | <i>aox1-Gfp</i>                    | 1369 | this study | pAox1-Gfp_NatR<br>(pUMa2169)                           | <i>aox1</i>           | AB33 <i>aox1</i> Δ |
| FB2P <sub>otef</sub> : <i>aox1</i> -Gfp        | <i>aox1-Gfp</i>                    | 1816 | this study | pP <sub>otef</sub> : <i>aox1</i> -Gfp_CbxR<br>(p2768)  | <i>ip<sup>s</sup></i> | FB2                |
| FB2P <sub>otef</sub> :5'UTR- <i>aox1</i> -Gfp  | <i>aox1-Gfp</i>                    | 1814 | this study | pP <sub>otef</sub> :5'UTR- <i>aox1</i> -Gfp<br>(p2767) | <i>ip<sup>s</sup></i> | FB2                |
| AB33P <sub>otef</sub> : <i>aox1</i> -Gfp       | <i>aox1-Gfp</i>                    | 1817 | this study | pP <sub>otef</sub> : <i>aox1</i> -Gfp_CbxR<br>(p2768)  | <i>ip<sup>s</sup></i> | AB33               |
| AB33P <sub>otef</sub> :5'UTR- <i>aox1</i> -Gfp | <i>aox1-Gfp</i>                    | 1815 | this study | pP <sub>otef</sub> :5'UTR- <i>aox1</i> -Gfp<br>(p2767) | <i>ip<sup>s</sup></i> | AB33               |

## Description of plasmids used for *U. maydis* strain generation.

| Plasmid                                    | pUMa | Resistance cassette                                 | Short description                                                                                                                                                                                                                                                                                                                                                                                                                                                          |
|--------------------------------------------|------|-----------------------------------------------------|----------------------------------------------------------------------------------------------------------------------------------------------------------------------------------------------------------------------------------------------------------------------------------------------------------------------------------------------------------------------------------------------------------------------------------------------------------------------------|
| pAox1Δ_HygR                                | 2163 | SfiI-insert of MF1hs                                | Plasmid for generating deletion mutants of <i>aox1</i> . Resistance cassette is flanked by 1 kb upstream and 1 kb downstream region of <i>aox1</i> . Flanking regions were amplified by PCR using oRL1400/oRL1401 and oRL1402/oRL1403 and UM521 wild-type DNA as template. Plasmid was generated by Golden Gate cloning [3]                                                                                                                                                |
| pAox1-Gfp_NatR                             | 2169 | SfiI-insert of pMF5-1n                              | Plasmid for generating eGfp fusions of <i>aox1</i> . A cassette containing Gfp, the T <sub>nos</sub> terminator and a nourseothricin resistance cassette is flanked by 2.4 kb upstream region including 1.3 kb of the <i>aox1</i> ORF and 1 kb downstream region of <i>aox1</i> . Flanking regions were amplified by PCR using oRL1400/oRL1425 and oRL1402/oRL1403 and UM521 wild-type DNA as template.                                                                    |
| pP <sub>otef</sub> :5UTR- <i>aox1</i> -Gfp | 2767 | CbxR for integration at <i>ip<sup>S</sup></i> locus | Plasmid for ectopical integration and expression of <i>aox1-Gfp</i> . Contains 1.3 kb open reading frame (ORF) of <i>aox1</i> N-terminally fused with eGfp flanked by strong constitutively active promoter P <sub>otef</sub> and transcriptional terminator T <sub>nos</sub> upstream and downstream, respectively. This construct retains the 65 bp 5' UTR of <i>aox1</i> . The ORF and 5' UTR were amplified by PCR using oMF894/oDD808 and pAox1-Gfp_NatR as template. |
| pP <sub>otef</sub> : <i>aox1</i> -Gfp_CbxR | 2768 | CbxR for integration at <i>ip<sup>S</sup></i> locus | Plasmid for ectopical integration and expression of <i>aox1-Gfp</i> . Contains 1.3 kb ORF of <i>aox1</i> N-terminally fused with eGfp flanked by strong constitutively active promoter P <sub>otef</sub> and transcriptional terminator T <sub>nos</sub> upstream and downstream, respectively. The ORF were amplified by PCR using oMF894/oDD809 and pAox1-Gfp_NatR as template.                                                                                          |

## DNA oligonucleotides used in this study.

| Designation | Nucleotide sequence (5' --> 3')       | Remarks               |
|-------------|---------------------------------------|-----------------------|
| oRL1400     | GGTCTCGCCTGCAATATTCCTGAGATAGTCGTTGAGG | <i>aox1</i> u2        |
| oRL1401     | GGTCTCCAGGCCGGTTACTGGCTTGGGCTG        | <i>aox1</i> u3        |
| oRL1402     | GGTCTCCGGCCCTGCTTTCCAACCTGGATTCTG     | <i>aox1</i> d1        |
| oRL1403     | GGTCTCGCTGCAATATTTTTCCCATGAGATGCTGC   | <i>aox1</i> d2        |
| oRL1425     | AATGGCCGCGTTGGCCGCAGCGGTCTTTTCGGCCGC  | <i>aox1</i> u3-fus    |
| oMF894      | TCGCAAGACCGCAACAG                     |                       |
| oDD808      | GGCGAATTCAGACTTTTAGCAACCATAACAAAGC    | Ectopic with 5'UTR    |
| oDD809      | CGGGAATTCATGTACGTTAGTACGCCCATC        | Ectopic without 5'UTR |
| oRL1399     | GTTCAACACGTCCGGAGG                    | <i>aox1</i> u1        |
| oRL1404     | CGCTGTTGCTCCATTCGG                    | <i>aox1</i> d3        |
| oRL1405     | AGGTACCCGGACCACAAC                    | <i>aox1</i> p1        |
| oRL1406     | GATTGAGCCAACCGTCGG                    | <i>aox1</i> p2        |

## Supplementary references

1. Banuett F, Herskowitz I. Different alleles of *Ustilago maydis* are necessary for maintenance of filamentous growth but not for meiosis. *Proceedings of the National Academy of Sciences of the United States of America*. 1989;86(15):5878-82.
2. Brachmann A, Weinzierl G, Kamper J, Kahmann R. Identification of genes in the bW/bE regulatory cascade in *Ustilago maydis*. *Molecular microbiology*. 2001;42(4):1047-63.
3. Terfruchte M, Joehnk B, Fajardo-Somera R, Braus GH, Riquelme M, Schipper K, et al. Establishing a versatile Golden Gate cloning system for genetic engineering in fungi. *Fungal genetics and biology : FG & B*. 2014;62:1-10.
